# Supplementary material
Source: PubMed Central journal article supplement (PMC6889293)
Supplement: 41422_2019_234_MOESM1_ESM.pdf [file 41422_2019_234_MOESM1_ESM.pdf]

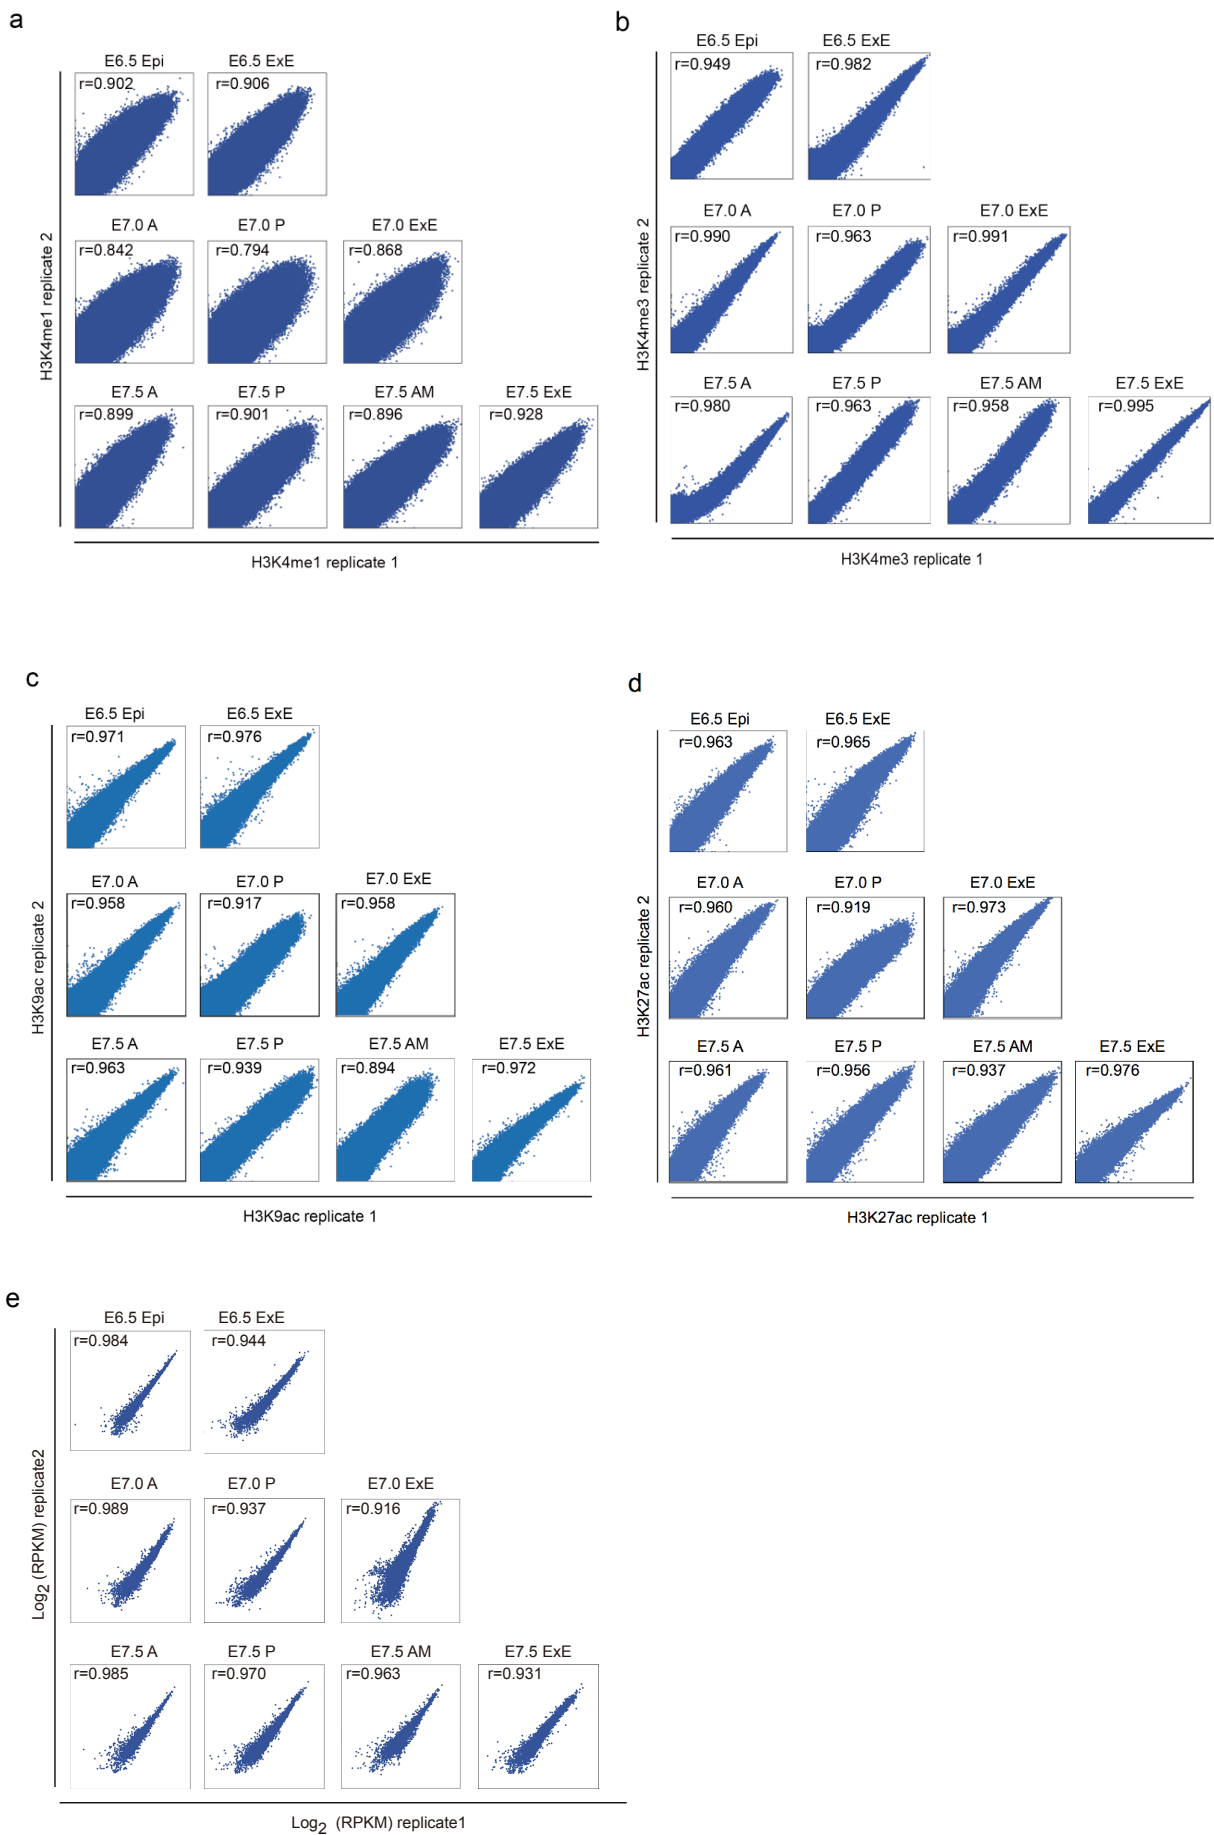

Supplementary information, Fig. S1 The reproducibility of sequencing data.

**Fig. S1 The reproducibility of sequencing data. a-e** Correlation of H3K4me1 (**a**), H3K4me3 (**b**), H3K9ac (**c**), H3K27ac (**d**) and gene expression (**e**) data between two biological replicates. Pearson correlation coefficients of two replicates are also shown.
