# Supplementary material
Source: PubMed Central journal article supplement (PMC6889293)
Supplement: 41422_2019_234_MOESM2_ESM.pdf [file 41422_2019_234_MOESM2_ESM.pdf]

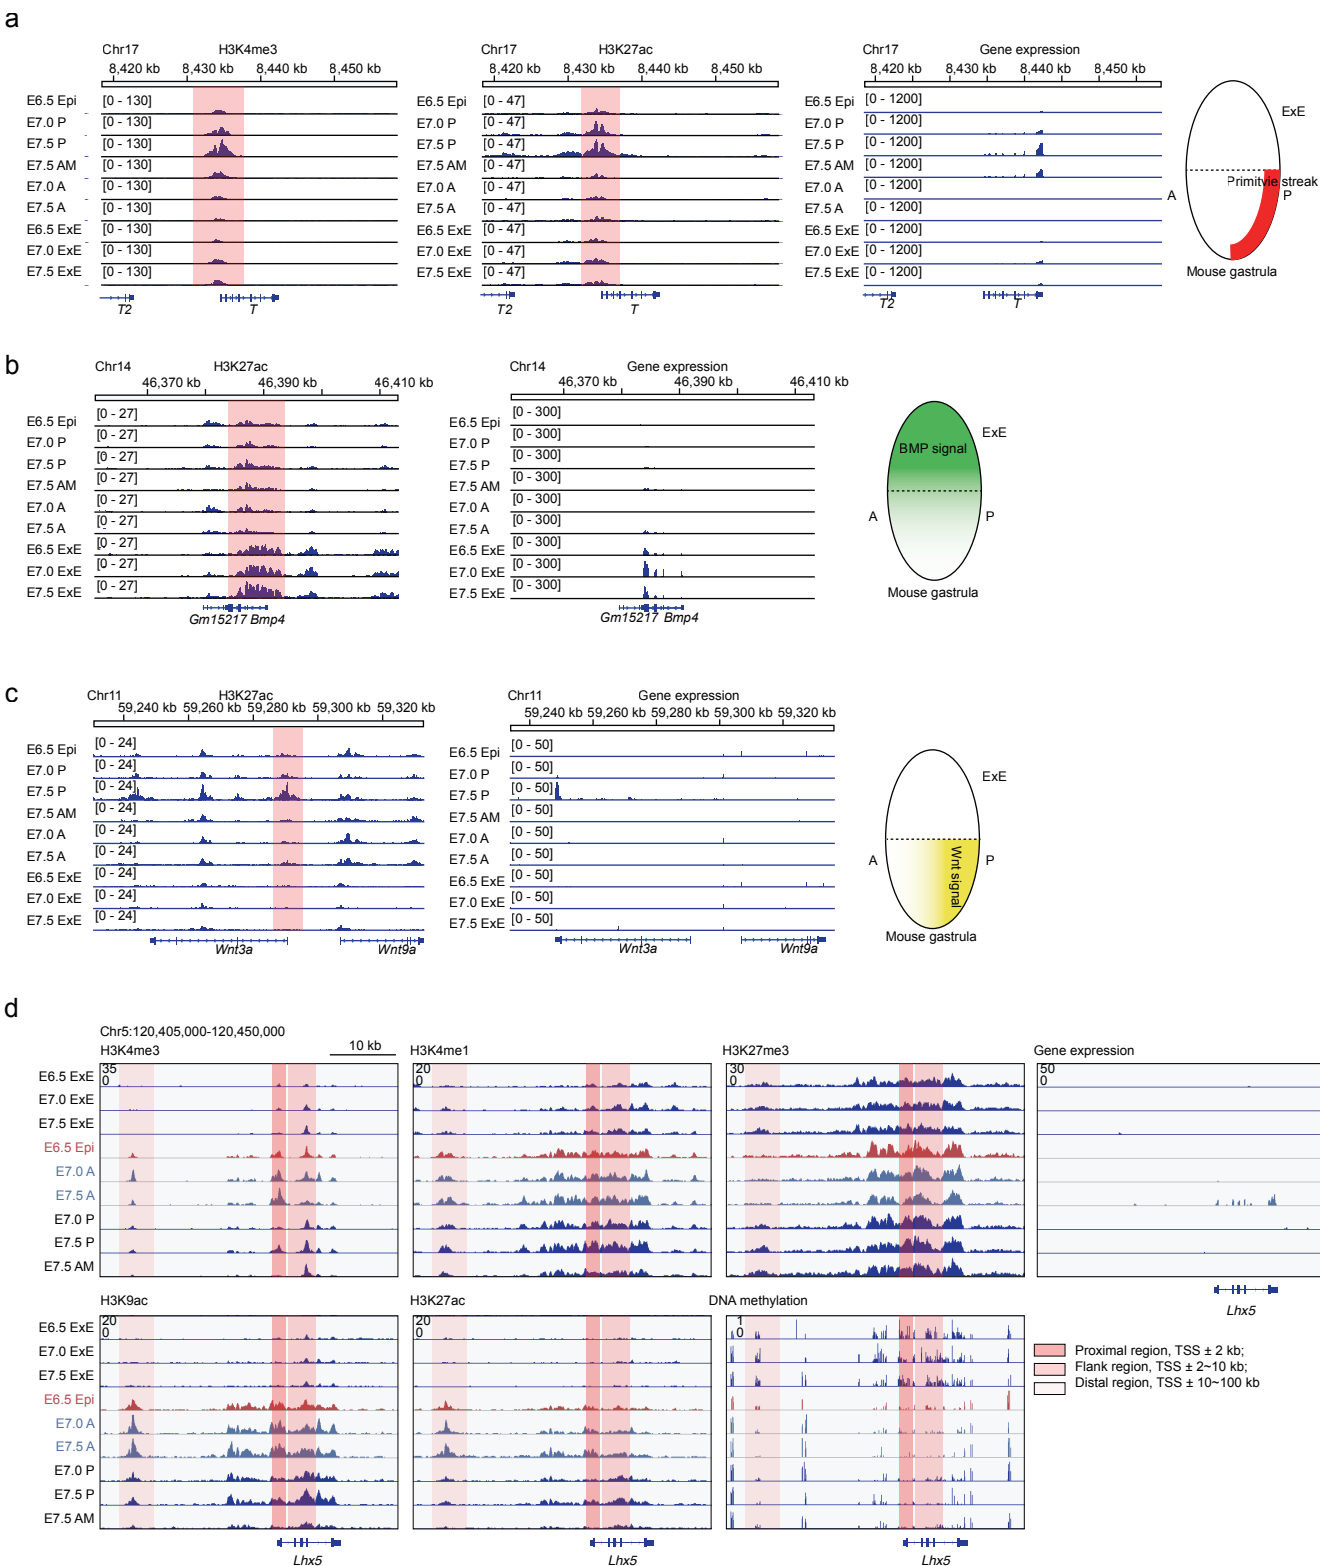

Supplementary information, Fig. S2 The representative genome browser snapshot exhibits epigenetic modification and gene expression changes during mouse gastrulation.

**Fig. S2 The representative genome browser snapshot exhibits epigenetic modification and gene expression changes during mouse gastrulation. a-d**

Representative genome browser snapshots of representative epigenomic and transcriptomic profile at the loci of *T* (a), *Bmp4* (b), *Wnt3a* (c), and *Lhx5* (d).

Epigenomic enrichments at distinct distances from *Lhx5* TSS are indicated with various shades of red.
